# Supplementary material for: Delivery of miRNA-Targeted Oligonucleotides in the Rat Striatum by Magnetofection with Neuromag®
Source: MDPI journal article supplement (doi:10.3390/molecules23071825), 2018-07-23
Supplement: s1 [file s1]

## Supplementary Figures

**Figure S1** – Magnetofection of Neuromag<sup>®</sup>-complexed FITC-labeled oligos in cortical cells.

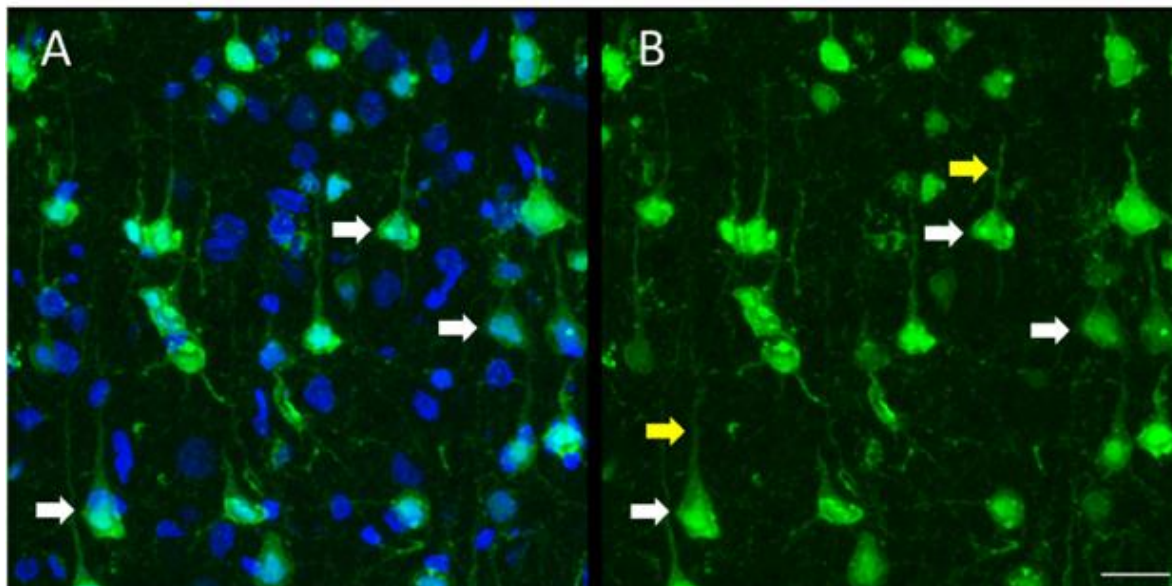

**Figure S1.** Fluorescence microscopy of brain cortical cells of rats injected with Neuromag<sup>®</sup>-complexed FITC-labeled oligonucleotides. The oligonucleotides were injected in rat cortex by stereotaxic surgery in animals anesthetized with isoflurane. In the right panel (**B**), a green fluorescence in soma (white arrows) and apical dendrites (yellow arrows) of pyramidal neurons of the brain cortex. On the left panel (**A**), the blue fluorescence of Hoescht 33342 nuclear staining in the same cells transfected with FITC-labeled oligos. Scale bar: 20  $\mu$ m.
